# Supplementary material
Source: PubMed Central journal article supplement (PMC6910637)
Supplement: jnm222505SupplementaryData.pdf [file jnm222505SupplementaryData.pdf]

## SUPPLEMENTAL TEXT 1: Applied equations

Standardized Uptake Values were calculated as follows\*:

$$\text{SUV} = \frac{\text{AC}_{\text{voi}} \text{ (kBq/ml)}}{\text{total tracer activity (MBq) / Body Weight (kg)}} \quad \begin{matrix} a \\ b \end{matrix}$$

<sup>a</sup> AC, activity concentration; VOI, Volume-Of-Interest

<sup>b</sup> Body Weight (*BW*) can be replaced by Lean Body Mass (LBM) or Body-Surface Area (BSA), for which the following formulas were used:

$$\begin{aligned} \text{LBM} &= 1.10 * \text{weight} - 128.0 * (\text{weight} / \text{height})^2 \\ \text{BSA} &= 0.007184 * \text{weight}^{0.425} * \text{height}^{0.725} \end{aligned}$$

\* Boellaard R, Oyen WJ, Hoekstra CJ, et al. The Netherlands protocol for standardisation and quantification of FDG whole body PET studies in multi-centre trials. *Eur J Nucl Med Mol Imaging*. 2008;35:2320-2333.

SUPPLEMENTAL TABLE 1: Overview of the applied reconstruction parameters.

| Center   | PET/CT system                   | Tracer                                       | Matrix Size | Reconstruction Algorithm              | Time-of-Flight | Point-Spread-Functions | Filter           | Voxel size (mm) | EARL calibrated |
|----------|---------------------------------|----------------------------------------------|-------------|---------------------------------------|----------------|------------------------|------------------|-----------------|-----------------|
| VUmc     | Philips, Ingenuity / Gemini TF  | <sup>18</sup> F-FCH / <sup>18</sup> F-DCFPyL | 144x144     | BLOB-OS-TF (3 iterations, 33 subsets) | yes            | no                     | none             | 4x4x4           | yes             |
| UMCU     | Siemens, Biograph40             | <sup>18</sup> F-FCH / <sup>68</sup> Ga-PSMA  | 200x200     | PSF-TOF (4 iterations, 21 subsets)    | yes            | yes                    | Gaussian 7.50 mm | 4.07x4.07 x3.00 | yes             |
| MSKCC    | General Electric, Discovery 710 | <sup>18</sup> F-FDHT                         | 128x128     | VPFXS (2 iterations, 24 subsets)      | yes            | yes                    | n/a              | 5.47x5.47 x3.27 | no              |
| AMC      | Philips, Gemini TF              | <sup>18</sup> F-FCH / <sup>68</sup> Ga-PSMA  | 144x144     | BLOB-OS-TF (3 iterations, 33 subsets) | yes            | no                     | none             | 4x4x4           | yes             |
| St-Anton | Philips, Gemini TF              | <sup>68</sup> Ga-PSMA                        | 144x144     | BLOB-OS-TF (3 iterations, 33 subsets) | yes            | no                     | none             | 4x4x4           | yes             |

*n/a = not available*

**SUPPLEMENTAL TABLE 2: Healthy Tissue Uptake of PCa PET Tracers (complete results)**

**[68Ga]PSMA**

|                             | SUVmax (BW) | SUVmax (LBM) | SUVmax (BSA) | SUVpeak (BW) | SUVpeak (LBM) | SUVpeak (BSA) | SUVmean (BW) | SUVmean (LBM) | SUVmean (BSA) |
|-----------------------------|-------------|--------------|--------------|--------------|---------------|---------------|--------------|---------------|---------------|
| <b>AORTA (5 slides 2x2)</b> |             |              |              |              |               |               |              |               |               |
| mean                        | 1.38        | 1.04         | 0.03         | 1.23         | 0.92          | 0.03          | 1.09         | 0.82          | 0.03          |
| SD                          | 0.28        | 0.20         | 0.01         | 0.23         | 0.17          | 0.01          | 0.24         | 0.18          | 0.01          |
| COV%                        | 20.4        | 19.7         | 19.9         | 19.0         | 18.6          | 19.0          | 22.4         | 22.5          | 22.9          |
| 95% range                   | (0.83-1.94) | (0.64-1.44)  | (0.02-0.05)  | (0.77-1.68)  | (0.58-1.26)   | (0.02-0.04)   | (0.61-1.57)  | (0.46-1.18)   | (0.01-0.04)   |
| <b>AORTA (2x2)</b>          |             |              |              |              |               |               |              |               |               |
| mean                        | 1.24        | 0.93         | 0.03         | 1.15         | 0.87          | 0.03          | 1.08         | 0.81          | 0.03          |
| SD                          | 0.29        | 0.22         | 0.01         | 0.24         | 0.18          | 0.01          | 0.26         | 0.20          | 0.01          |
| COV%                        | 23.4        | 24.0         | 24.4         | 20.6         | 21.1          | 21.6          | 24.3         | 25.0          | 25.5          |
| 95% range                   | (0.67-1.8)  | (0.49-1.37)  | (0.02-0.04)  | (0.69-1.62)  | (0.51-1.23)   | (0.02-0.04)   | (0.57-1.59)  | (0.41-1.21)   | (0.01-0.04)   |
| <b>AORTA (3x3)</b>          |             |              |              |              |               |               |              |               |               |
| mean                        | 1.33        | 1.00         | 0.03         | 1.20         | 0.90          | 0.03          | 1.08         | 0.81          | 0.03          |
| SD                          | 0.27        | 0.21         | 0.01         | 0.22         | 0.17          | 0.01          | 0.23         | 0.18          | 0.01          |
| COV%                        | 19.9        | 20.7         | 21.1         | 18.7         | 19.2          | 19.7          | 20.9         | 22.0          | 22.5          |
| 95% range                   | (0.81-1.85) | (0.59-1.41)  | (0.02-0.04)  | (0.76-1.64)  | (0.56-1.24)   | (0.02-0.04)   | (0.64-1.52)  | (0.46-1.16)   | (0.01-0.04)   |
| <b>LIVER</b>                |             |              |              |              |               |               |              |               |               |
| mean                        | 6.41        | 4.80         | 0.15         | 5.66         | 4.24          | 0.13          | 4.78         | 3.58          | 0.11          |
| SD                          | 2.04        | 1.46         | 0.05         | 1.89         | 1.36          | 0.04          | 1.62         | 1.18          | 0.04          |
| COV%                        | 31.8        | 30.4         | 30.1         | 33.4         | 32.0          | 31.8          | 33.9         | 32.8          | 32.7          |
| 95% range                   | (2.41-10.4) | (1.94-7.66)  | (0.06-0.24)  | (1.96-9.37)  | (1.58-6.9)    | (0.05-0.22)   | (1.61-7.96)  | (1.28-5.89)   | (0.04-0.19)   |
| <b>LUNG-APICALLY</b>        |             |              |              |              |               |               |              |               |               |
| mean                        | 1.05        | 0.79         | 0.02         | 0.84         | 0.63          | 0.02          | 0.56         | 0.42          | 0.01          |
| SD                          | 0.31        | 0.22         | 0.01         | 0.26         | 0.19          | 0.01          | 0.18         | 0.13          | 0.00          |
| COV%                        | 29.8        | 28.6         | 28.9         | 30.8         | 30.3          | 30.6          | 32.7         | 32.0          | 32.4          |
| 95% range                   | (0.44-1.66) | (0.34-1.23)  | (0.01-0.04)  | (0.33-1.35)  | (0.26-1.01)   | (0.01-0.03)   | (0.2-0.91)   | (0.16-0.68)   | (0-0.02)      |
| <b>LUNG-BASALLY</b>         |             |              |              |              |               |               |              |               |               |
| mean                        | 1.36        | 1.02         | 0.03         | 1.20         | 0.90          | 0.03          | 0.73         | 0.55          | 0.02          |
| SD                          | 0.48        | 0.35         | 0.01         | 0.45         | 0.33          | 0.01          | 0.23         | 0.17          | 0.01          |
| COV%                        | 35.2        | 34.0         | 33.1         | 37.1         | 36.1          | 35.4          | 32.1         | 31.5          | 31.0          |
| 95% range                   | (0.42-2.3)  | (0.34-1.7)   | (0.01-0.05)  | (0.33-2.08)  | (0.26-1.54)   | (0.01-0.05)   | (0.27-1.19)  | (0.21-0.88)   | (0.01-0.03)   |

**LUMBAR VERTEBRA**

|           |             |             |             |             |             |             |             |             |          |
|-----------|-------------|-------------|-------------|-------------|-------------|-------------|-------------|-------------|----------|
| mean      | 1.24        | 0.93        | 0.03        | 0.99        | 0.74        | 0.02        | 0.67        | 0.50        | 0.02     |
| SD        | 0.43        | 0.32        | 0.01        | 0.33        | 0.24        | 0.01        | 0.26        | 0.19        | 0.01     |
| COV%      | 35.0        | 33.9        | 33.3        | 33.4        | 32.4        | 32.0        | 38.5        | 38.0        | 37.7     |
| 95% range | (0.39-2.09) | (0.31-1.55) | (0.01-0.05) | (0.34-1.63) | (0.27-1.21) | (0.01-0.04) | (0.16-1.17) | (0.13-0.87) | (0-0.03) |

**THORACIC VERTEBRA**

|           |             |            |             |            |             |             |             |            |             |
|-----------|-------------|------------|-------------|------------|-------------|-------------|-------------|------------|-------------|
| mean      | 1.25        | 0.93       | 0.03        | 1.02       | 0.76        | 0.02        | 0.69        | 0.52       | 0.02        |
| SD        | 0.41        | 0.29       | 0.01        | 0.30       | 0.22        | 0.01        | 0.23        | 0.17       | 0.01        |
| COV%      | 33.0        | 31.2       | 30.7        | 29.4       | 28.3        | 28.2        | 32.5        | 31.8       | 31.8        |
| 95% range | (0.44-2.05) | (0.36-1.5) | (0.01-0.05) | (0.43-1.6) | (0.34-1.19) | (0.01-0.04) | (0.25-1.13) | (0.2-0.85) | (0.01-0.03) |

**MUSCLE**

|           |             |             |             |             |            |             |             |            |          |
|-----------|-------------|-------------|-------------|-------------|------------|-------------|-------------|------------|----------|
| mean      | 0.94        | 0.71        | 0.02        | 0.76        | 0.57       | 0.02        | 0.50        | 0.38       | 0.01     |
| SD        | 0.29        | 0.21        | 0.01        | 0.25        | 0.19       | 0.01        | 0.18        | 0.14       | 0.00     |
| COV%      | 30.8        | 30.1        | 30.3        | 33.6        | 33.2       | 33.3        | 37.0        | 37.3       | 37.6     |
| 95% range | (0.37-1.51) | (0.29-1.13) | (0.01-0.04) | (0.26-1.26) | (0.2-0.94) | (0.01-0.03) | (0.14-0.86) | (0.1-0.65) | (0-0.02) |

| Average COV%   |      |      |      |
|----------------|------|------|------|
|                | BW   | LBM  | BSA  |
| <i>SUVmax</i>  | 30.1 | 29.2 | 29.1 |
| <i>SUVpeak</i> | 29.9 | 29.2 | 29.2 |
| <i>SUVmean</i> | 32.6 | 32.3 | 32.4 |
| <i>total</i>   | 30.8 | 30.2 | 30.3 |

*BW, body weight; LBM, lean-body mass; BSA, body-surface area*

## [18F]DCFPyL

|                             | SUVmax (BW) | SUVmax (LBM) | SUVmax (BSA) | SUVpeak (BW) | SUVpeak (LBM) | SUVpeak (BSA) | SUVmean (BW) | SUVmean (LBM) | SUVmean (BSA) |
|-----------------------------|-------------|--------------|--------------|--------------|---------------|---------------|--------------|---------------|---------------|
| <b>AORTA (5 slides 2x2)</b> |             |              |              |              |               |               |              |               |               |
| mean                        | 1.16        | 0.88         | 0.03         | 1.09         | 0.83          | 0.03          | 1.01         | 0.78          | 0.02          |
| SD                          | 0.17        | 0.12         | 0.00         | 0.15         | 0.11          | 0.00          | 0.14         | 0.10          | 0.00          |
| COV%                        | 14.82       | 13.63        | 13.69        | 14.03        | 12.71         | 12.78         | 14.18        | 13.15         | 13.21         |
| 95% range                   | (0.82-1.49) | (0.65-1.12)  | (0.02-0.04)  | (0.79-1.39)  | (0.62-1.04)   | (0.02-0.03)   | (0.73-1.3)   | (0.58-0.98)   | (0.02-0.03)   |
| <b>AORTA (2x2)</b>          |             |              |              |              |               |               |              |               |               |
| mean                        | 1.07        | 0.82         | 0.03         | 1.04         | 0.79          | 0.03          | 1.01         | 0.77          | 0.02          |
| SD                          | 0.17        | 0.12         | 0.00         | 0.15         | 0.10          | 0.00          | 0.15         | 0.10          | 0.00          |
| COV%                        | 15.78       | 14.12        | 13.92        | 14.60        | 12.81         | 12.65         | 14.62        | 13.43         | 13.27         |
| 95% range                   | (0.74-1.4)  | (0.59-1.04)  | (0.02-0.03)  | (0.74-1.34)  | (0.59-0.99)   | (0.02-0.03)   | (0.72-1.3)   | (0.57-0.97)   | (0.02-0.03)   |
| <b>AORTA (3x3)</b>          |             |              |              |              |               |               |              |               |               |
| mean                        | 1.12        | 0.86         | 0.03         | 1.06         | 0.81          | 0.03          | 1.01         | 0.77          | 0.02          |
| SD                          | 0.16        | 0.11         | 0.00         | 0.15         | 0.10          | 0.00          | 0.14         | 0.10          | 0.00          |
| COV%                        | 14.38       | 12.44        | 12.15        | 13.76        | 11.82         | 11.71         | 13.51        | 12.39         | 12.25         |
| 95% range                   | (0.81-1.44) | (0.65-1.07)  | (0.02-0.03)  | (0.78-1.35)  | (0.62-1)      | (0.02-0.03)   | (0.74-1.27)  | (0.58-0.96)   | (0.02-0.03)   |
| <b>LIVER</b>                |             |              |              |              |               |               |              |               |               |
| mean                        | 6.84        | 5.23         | 0.17         | 6.48         | 4.96          | 0.16          | 5.92         | 4.53          | 0.14          |
| SD                          | 1.48        | 1.12         | 0.03         | 1.43         | 1.09          | 0.03          | 1.33         | 1.02          | 0.03          |
| COV%                        | 21.7        | 21.3         | 21.0         | 22.1         | 22.0          | 21.8          | 22.5         | 22.5          | 22.2          |
| 95% range                   | (3.93-9.75) | (3.05-7.42)  | (0.1-0.23)   | (3.67-9.29)  | (2.82-7.1)    | (0.09-0.22)   | (3.31-8.53)  | (2.54-6.53)   | (0.08-0.21)   |
| <b>LUNG-APICALLY</b>        |             |              |              |              |               |               |              |               |               |
| mean                        | 0.64        | 0.48         | 0.02         | 0.58         | 0.44          | 0.01          | 0.44         | 0.33          | 0.01          |
| SD                          | 0.18        | 0.12         | 0.00         | 0.17         | 0.11          | 0.00          | 0.13         | 0.08          | 0.00          |
| COV%                        | 28.5        | 24.6         | 23.9         | 29.4         | 25.6          | 24.9          | 28.5         | 25.1          | 24.6          |
| 95% range                   | (0.28-1)    | (0.25-0.72)  | (0.01-0.02)  | (0.25-0.91)  | (0.22-0.66)   | (0.01-0.02)   | (0.19-0.68)  | (0.17-0.5)    | (0.01-0.02)   |
| <b>LUNG-BASALLY</b>         |             |              |              |              |               |               |              |               |               |
| mean                        | 0.78        | 0.59         | 0.02         | 0.73         | 0.56          | 0.02          | 0.50         | 0.38          | 0.01          |
| SD                          | 0.24        | 0.17         | 0.01         | 0.24         | 0.18          | 0.01          | 0.13         | 0.09          | 0.00          |
| COV%                        | 31.0        | 29.4         | 29.4         | 33.0         | 31.4          | 31.4          | 26.0         | 23.7          | 23.5          |
| 95% range                   | (0.31-1.25) | (0.25-0.93)  | (0.01-0.03)  | (0.26-1.21)  | (0.21-0.9)    | (0.01-0.03)   | (0.25-0.76)  | (0.21-0.56)   | (0.01-0.02)   |

**LUMBAR VERTEBRA**

|           |             |             |             |             |             |             |             |             |             |
|-----------|-------------|-------------|-------------|-------------|-------------|-------------|-------------|-------------|-------------|
| mean      | 1.07        | 0.81        | 0.03        | 0.96        | 0.73        | 0.02        | 0.77        | 0.58        | 0.02        |
| SD        | 0.35        | 0.24        | 0.01        | 0.30        | 0.21        | 0.01        | 0.25        | 0.18        | 0.01        |
| COV%      | 32.3        | 29.9        | 29.3        | 31.0        | 28.9        | 28.4        | 32.6        | 30.9        | 30.4        |
| 95% range | (0.39-1.75) | (0.34-1.29) | (0.01-0.04) | (0.38-1.54) | (0.32-1.14) | (0.01-0.04) | (0.28-1.26) | (0.23-0.94) | (0.01-0.03) |

**THORACIC VERTEBRA**

|           |             |             |             |             |             |             |             |             |             |
|-----------|-------------|-------------|-------------|-------------|-------------|-------------|-------------|-------------|-------------|
| mean      | 1.06        | 0.81        | 0.03        | 0.95        | 0.73        | 0.02        | 0.75        | 0.57        | 0.02        |
| SD        | 0.29        | 0.19        | 0.01        | 0.23        | 0.16        | 0.01        | 0.21        | 0.15        | 0.00        |
| COV%      | 27.2        | 24.0        | 23.1        | 24.7        | 22.4        | 21.8        | 28.4        | 26.5        | 26.0        |
| 95% range | (0.49-1.62) | (0.43-1.19) | (0.01-0.04) | (0.49-1.41) | (0.41-1.04) | (0.01-0.03) | (0.33-1.16) | (0.27-0.87) | (0.01-0.03) |

**MUSCLE**

|           |             |            |             |             |             |             |             |             |          |
|-----------|-------------|------------|-------------|-------------|-------------|-------------|-------------|-------------|----------|
| mean      | 0.79        | 0.61       | 0.02        | 0.71        | 0.55        | 0.02        | 0.55        | 0.42        | 0.01     |
| SD        | 0.27        | 0.21       | 0.01        | 0.26        | 0.20        | 0.01        | 0.21        | 0.16        | 0.01     |
| COV%      | 34.5        | 34.2       | 34.4        | 35.9        | 35.8        | 35.9        | 37.8        | 38.1        | 38.4     |
| 95% range | (0.26-1.33) | (0.2-1.01) | (0.01-0.03) | (0.21-1.21) | (0.16-0.93) | (0.01-0.03) | (0.14-0.97) | (0.11-0.74) | (0-0.02) |

| Average COV%   |      |      |      |
|----------------|------|------|------|
|                | BW   | LBM  | BSA  |
| <i>SUVmax</i>  | 27.1 | 25.1 | 24.8 |
| <i>SUVpeak</i> | 27.1 | 25.4 | 25.1 |
| <i>SUVmean</i> | 27.1 | 25.6 | 25.3 |
| <i>total</i>   | 27.1 | 25.4 | 25.1 |

*BW, body weight; LBM, lean-body mass; BSA, body-surface area*

## [18F]FCH

|                             | SUVmax (BW)  | SUVmax (LBM) | SUVmax (BSA) | SUVpeak (BW) | SUVpeak (LBM) | SUVpeak (BSA) | SUVmean (BW) | SUVmean (LBM) | SUVmean (BSA) |
|-----------------------------|--------------|--------------|--------------|--------------|---------------|---------------|--------------|---------------|---------------|
| <b>AORTA (5 slides 2x2)</b> |              |              |              |              |               |               |              |               |               |
| mean                        | 0.78         | 0.59         | 0.02         | 0.73         | 0.55          | 0.02          | 0.63         | 0.48          | 0.02          |
| SD                          | 0.15         | 0.11         | 0.00         | 0.14         | 0.11          | 0.00          | 0.14         | 0.10          | 0.00          |
| COV%                        | 19.6         | 19.4         | 20.0         | 19.7         | 19.1          | 19.7          | 22.7         | 21.7          | 22.1          |
| 95% range                   | (0.48-1.07)  | (0.37-0.81)  | (0.01-0.03)  | (0.45-1.01)  | (0.34-0.76)   | (0.01-0.02)   | (0.35-0.91)  | (0.27-0.68)   | (0.01-0.02)   |
| <b>AORTA (2x2)</b>          |              |              |              |              |               |               |              |               |               |
| mean                        | 0.69         | 0.53         | 0.02         | 0.68         | 0.51          | 0.02          | 0.62         | 0.47          | 0.01          |
| SD                          | 0.16         | 0.12         | 0.00         | 0.14         | 0.10          | 0.00          | 0.14         | 0.10          | 0.00          |
| COV%                        | 22.6         | 22.0         | 22.5         | 20.9         | 20.0          | 20.5          | 23.2         | 21.9          | 22.4          |
| 95% range                   | (0.39-1)     | (0.3-0.75)   | (0.01-0.02)  | (0.4-0.96)   | (0.31-0.71)   | (0.01-0.02)   | (0.34-0.9)   | (0.27-0.67)   | (0.01-0.02)   |
| <b>AORTA (3x3)</b>          |              |              |              |              |               |               |              |               |               |
| mean                        | 0.75         | 0.57         | 0.02         | 0.71         | 0.54          | 0.02          | 0.63         | 0.47          | 0.01          |
| SD                          | 0.17         | 0.13         | 0.00         | 0.15         | 0.11          | 0.00          | 0.14         | 0.10          | 0.00          |
| COV%                        | 22.5         | 22.0         | 22.4         | 20.7         | 19.9          | 20.2          | 23.1         | 22.1          | 22.4          |
| 95% range                   | (0.42-1.08)  | (0.32-0.82)  | (0.01-0.03)  | (0.42-1)     | (0.33-0.75)   | (0.01-0.02)   | (0.34-0.91)  | (0.27-0.68)   | (0.01-0.02)   |
| <b>LIVER</b>                |              |              |              |              |               |               |              |               |               |
| mean                        | 10.84        | 8.19         | 0.26         | 10.21        | 7.71          | 0.25          | 9.17         | 6.93          | 0.22          |
| SD                          | 1.82         | 1.39         | 0.05         | 1.72         | 1.36          | 0.04          | 1.56         | 1.25          | 0.04          |
| COV%                        | 16.8         | 17.0         | 17.6         | 16.8         | 17.6          | 18.3          | 17.0         | 18.0          | 18.7          |
| 95% range                   | (7.27-14.42) | (5.45-10.92) | (0.17-0.35)  | (6.84-13.58) | (5.05-10.38)  | (0.16-0.33)   | (6.11-12.23) | (4.48-9.38)   | (0.14-0.3)    |
| <b>LUNG-APICALLY</b>        |              |              |              |              |               |               |              |               |               |
| mean                        | 1.03         | 0.77         | 0.02         | 0.95         | 0.71          | 0.02          | 0.64         | 0.48          | 0.02          |
| SD                          | 0.29         | 0.20         | 0.01         | 0.26         | 0.18          | 0.01          | 0.21         | 0.15          | 0.00          |
| COV%                        | 28.2         | 26.2         | 26.2         | 27.4         | 25.6          | 25.6          | 32.8         | 30.5          | 30.4          |
| 95% range                   | (0.46-1.6)   | (0.38-1.17)  | (0.01-0.04)  | (0.44-1.46)  | (0.36-1.07)   | (0.01-0.03)   | (0.23-1.05)  | (0.19-0.76)   | (0.01-0.02)   |
| <b>LUNG-BASALLY</b>         |              |              |              |              |               |               |              |               |               |
| mean                        | 1.48         | 1.12         | 0.04         | 1.43         | 1.08          | 0.03          | 0.95         | 0.72          | 0.02          |
| SD                          | 0.47         | 0.36         | 0.01         | 0.47         | 0.36          | 0.01          | 0.28         | 0.20          | 0.01          |
| COV%                        | 31.6         | 32.0         | 32.0         | 33.0         | 33.8          | 33.9          | 29.3         | 28.6          | 28.6          |
| 95% range                   | (0.56-2.4)   | (0.42-1.82)  | (0.01-0.06)  | (0.51-2.35)  | (0.36-1.79)   | (0.01-0.06)   | (0.4-1.5)    | (0.31-1.12)   | (0.01-0.04)   |

**LUMBAR VERTEBRA**

|           |             |            |             |            |             |             |             |             |             |
|-----------|-------------|------------|-------------|------------|-------------|-------------|-------------|-------------|-------------|
| mean      | 3.13        | 2.36       | 0.07        | 2.69       | 2.03        | 0.06        | 2.33        | 1.76        | 0.06        |
| SD        | 0.76        | 0.54       | 0.02        | 0.66       | 0.48        | 0.02        | 0.61        | 0.45        | 0.01        |
| COV%      | 24.2        | 22.9       | 22.7        | 24.6       | 23.7        | 23.6        | 26.4        | 25.8        | 25.7        |
| 95% range | (1.65-4.62) | (1.3-3.42) | (0.04-0.11) | (1.4-3.99) | (1.09-2.97) | (0.03-0.09) | (1.13-3.53) | (0.87-2.65) | (0.03-0.08) |

**THORACIC VERTEBRA**

|           |             |             |             |             |             |             |             |             |             |
|-----------|-------------|-------------|-------------|-------------|-------------|-------------|-------------|-------------|-------------|
| mean      | 1.72        | 1.30        | 0.04        | 1.50        | 1.13        | 0.04        | 1.25        | 0.94        | 0.03        |
| SD        | 0.54        | 0.40        | 0.01        | 0.51        | 0.38        | 0.01        | 0.47        | 0.35        | 0.01        |
| COV%      | 31.4        | 30.8        | 30.7        | 34.3        | 33.9        | 33.8        | 37.3        | 37.1        | 37.1        |
| 95% range | (0.66-2.78) | (0.51-2.08) | (0.02-0.07) | (0.49-2.51) | (0.38-1.88) | (0.01-0.06) | (0.33-2.16) | (0.26-1.63) | (0.01-0.05) |

**MUSCLE**

|           |             |             |             |             |             |             |             |             |             |
|-----------|-------------|-------------|-------------|-------------|-------------|-------------|-------------|-------------|-------------|
| mean      | 3.68        | 2.78        | 0.09        | 3.17        | 2.40        | 0.08        | 2.78        | 2.11        | 0.07        |
| SD        | 0.74        | 0.55        | 0.02        | 0.66        | 0.48        | 0.02        | 0.58        | 0.42        | 0.01        |
| COV%      | 20.2        | 19.6        | 19.5        | 21.0        | 20.1        | 20.0        | 20.9        | 20.1        | 20.0        |
| 95% range | (2.22-5.13) | (1.71-3.85) | (0.05-0.12) | (1.87-4.48) | (1.45-3.35) | (0.05-0.11) | (1.64-3.93) | (1.28-2.94) | (0.04-0.09) |

| Average COV%   |      |      |      |
|----------------|------|------|------|
|                | BW   | LBM  | BSA  |
| <i>SUVmax</i>  | 25.0 | 24.4 | 24.5 |
| <i>SUVpeak</i> | 25.4 | 25.0 | 25.1 |
| <i>SUVmean</i> | 26.7 | 26.0 | 26.1 |
| <i>total</i>   | 25.7 | 25.1 | 25.2 |

*BW, body weight; LBM, lean-body mass; BSA, body-surface area*



## [18F]FDHT

|                             | SUVmax (BW) | SUVmax (LBM) | SUVmax (BSA) | SUVpeak (BW) | SUVpeak (LBM) | SUVpeak (BSA) | SUVmean (BW) | SUVmean (LBM) | SUVmean (BSA) |
|-----------------------------|-------------|--------------|--------------|--------------|---------------|---------------|--------------|---------------|---------------|
| <b>AORTA (5 slides 2x2)</b> |             |              |              |              |               |               |              |               |               |
| mean                        | 5.20        | 3.88         | 0.12         | 4.84         | 3.61          | 0.12          | 4.73         | 3.53          | 0.11          |
| SD                          | 1.06        | 0.73         | 0.02         | 0.95         | 0.67          | 0.02          | 1.02         | 0.72          | 0.02          |
| COV%                        | 20.4        | 18.8         | 19.4         | 19.5         | 18.5          | 19.2          | 21.6         | 20.3          | 21.0          |
| 95% range                   | (3.12-7.16) | (2.45-5.84)  | (0.08-2.08)  | (2.98-6.8)   | (2.3-5.57)    | (0.07-2.08)   | (2.73-6.69)  | (2.12-5.49)   | (0.07-2.07)   |
| <b>AORTA (2x2)</b>          |             |              |              |              |               |               |              |               |               |
| mean                        | 5.10        | 3.80         | 0.12         | 4.87         | 3.62          | 0.12          | 4.86         | 3.62          | 0.12          |
| SD                          | 1.13        | 0.78         | 0.03         | 1.04         | 0.72          | 0.02          | 1.07         | 0.75          | 0.02          |
| COV%                        | 22.2        | 20.5         | 20.9         | 21.3         | 19.9          | 20.4          | 22.1         | 20.8          | 21.3          |
| 95% range                   | (2.88-7.32) | (2.27-5.32)  | (0.07-0.17)  | (2.83-6.91)  | (2.21-5.04)   | (0.07-0.16)   | (2.75-6.96)  | (2.14-5.09)   | (0.07-0.16)   |
| <b>AORTA (3x3)</b>          |             |              |              |              |               |               |              |               |               |
| mean                        | 5.24        | 3.90         | 0.12         | 4.88         | 3.63          | 0.12          | 4.71         | 3.50          | 0.11          |
| SD                          | 1.11        | 0.76         | 0.02         | 1.05         | 0.73          | 0.02          | 1.15         | 0.82          | 0.03          |
| COV%                        | 21.2        | 19.4         | 19.9         | 21.6         | 20.2          | 20.6          | 24.5         | 23.3          | 23.7          |
| 95% range                   | (3.06-7.2)  | (2.42-5.86)  | (0.08-2.08)  | (2.81-6.84)  | (2.2-5.59)    | (0.07-2.08)   | (2.45-6.67)  | (1.9-5.46)    | (0.06-2.07)   |
| <b>LIVER</b>                |             |              |              |              |               |               |              |               |               |
| mean                        | 5.12        | 3.83         | 0.12         | 4.59         | 3.44          | 0.11          | 4.10         | 3.08          | 0.10          |
| SD                          | 0.75        | 0.62         | 0.02         | 0.64         | 0.56          | 0.02          | 0.65         | 0.58          | 0.02          |
| COV%                        | 14.6        | 16.1         | 16.2         | 14.0         | 16.3          | 16.7          | 15.9         | 19.0          | 19.6          |
| 95% range                   | (3.65-7.08) | (2.62-5.79)  | (0.08-2.08)  | (3.33-6.55)  | (2.34-5.4)    | (0.07-2.07)   | (2.83-6.06)  | (1.93-5.04)   | (0.06-2.06)   |
| <b>LUNG-APICALLY</b>        |             |              |              |              |               |               |              |               |               |
| mean                        | 1.36        | 0.99         | 0.03         | 1.19         | 0.87          | 0.03          | 0.90         | 0.66          | 0.02          |
| SD                          | 0.53        | 0.32         | 0.01         | 0.44         | 0.27          | 0.01          | 0.33         | 0.20          | 0.01          |
| COV%                        | 39.3        | 32.3         | 31.4         | 37.4         | 31.0          | 30.3          | 36.5         | 30.5          | 29.9          |
| 95% range                   | (0.31-3.32) | (0.36-2.95)  | (0.01-1.99)  | (0.32-3.15)  | (0.34-2.83)   | (0.01-1.99)   | (0.26-2.86)  | (0.26-2.62)   | (0.01-1.98)   |
| <b>LUNG-BASALLY</b>         |             |              |              |              |               |               |              |               |               |
| mean                        | 1.61        | 1.19         | 0.04         | 1.48         | 1.10          | 0.04          | 1.00         | 0.74          | 0.02          |
| SD                          | 0.46        | 0.29         | 0.01         | 0.44         | 0.28          | 0.01          | 0.25         | 0.16          | 0.01          |
| COV%                        | 28.6        | 24.2         | 24.0         | 29.4         | 25.8          | 25.6          | 25.3         | 21.1          | 21.1          |
| 95% range                   | (0.71-3.57) | (0.63-3.15)  | (0.02-2)     | (0.63-3.44)  | (0.54-3.06)   | (0.02-2)      | (0.51-2.96)  | (0.44-2.7)    | (0.01-1.98)   |

**LUMBAR VERTEBRA**

|           |             |             |             |             |             |             |             |             |          |
|-----------|-------------|-------------|-------------|-------------|-------------|-------------|-------------|-------------|----------|
| mean      | 2.18        | 1.60        | 0.05        | 1.93        | 1.42        | 0.05        | 1.60        | 1.18        | 0.04     |
| SD        | 0.52        | 0.30        | 0.01        | 0.44        | 0.28        | 0.01        | 0.36        | 0.23        | 0.01     |
| COV%      | 23.6        | 18.6        | 18.0        | 22.7        | 19.5        | 19.3        | 22.6        | 19.4        | 19.3     |
| 95% range | (1.17-4.14) | (1.01-3.56) | (0.03-2.01) | (1.07-3.89) | (0.88-3.38) | (0.03-2.01) | (0.89-3.56) | (0.73-3.14) | (0.02-2) |

**THORACIC VERTEBRA**

|           |             |             |             |             |             |          |             |             |             |
|-----------|-------------|-------------|-------------|-------------|-------------|----------|-------------|-------------|-------------|
| mean      | 1.95        | 1.43        | 0.05        | 1.72        | 1.27        | 0.04     | 1.36        | 1.00        | 0.03        |
| SD        | 0.42        | 0.28        | 0.01        | 0.33        | 0.23        | 0.01     | 0.25        | 0.19        | 0.01        |
| COV%      | 21.6        | 19.4        | 19.2        | 19.4        | 18.3        | 18.4     | 18.8        | 18.5        | 18.8        |
| 95% range | (1.12-3.91) | (0.89-3.39) | (0.03-2.01) | (1.06-3.68) | (0.81-3.23) | (0.03-2) | (0.86-3.32) | (0.64-2.96) | (0.02-1.99) |

**MUSCLE**

|           |            |           |             |             |             |             |             |             |             |
|-----------|------------|-----------|-------------|-------------|-------------|-------------|-------------|-------------|-------------|
| mean      | 1.14       | 0.84      | 0.03        | 0.96        | 0.71        | 0.02        | 0.76        | 0.57        | 0.02        |
| SD        | 0.26       | 0.17      | 0.01        | 0.18        | 0.12        | 0.00        | 0.15        | 0.11        | 0.00        |
| COV%      | 23.1       | 20.4      | 19.9        | 18.7        | 17.2        | 17.4        | 19.9        | 19.2        | 19.4        |
| 95% range | (0.62-3.1) | (0.5-2.8) | (0.02-1.99) | (0.61-2.92) | (0.47-2.67) | (0.01-1.98) | (0.47-2.72) | (0.35-2.53) | (0.01-1.98) |

| Average COV%   |      |      |      |
|----------------|------|------|------|
|                | BW   | LBM  | BSA  |
| <i>SUVmax</i>  | 24.6 | 21.5 | 21.2 |
| <i>SUVpeak</i> | 23.3 | 21.2 | 21.2 |
| <i>SUVmean</i> | 23.3 | 21.6 | 21.7 |
| <i>total</i>   | 23.7 | 21.4 | 21.4 |

*BW, body weight; LBM, lean-body mass; BSA, body-surface area*
